# Supplementary material for: Evolutionarily unique mechanistic framework of clathrin-mediated endocytosis in plants
Source: eLife journal article supplement (doi:10.7554/elife.52067), 2020-01-23
Supplement: fig1-figsupp1-data1 [file data summary for fig 1E.xlsx]

## Sheet: PM_basket type _ diameter
Values from PM vesicles and pits from all experiment
Diameter	Type
65.947	Hexagonal baskets					PM - Plasma membrane
59.743	Hexagonal baskets					Mediumsized = Irregular basket type
71.648	Hexagonal baskets
66.339	Hexagonal baskets
64.14	Hexagonal baskets
72.09	Hexagonal baskets
62.101	Hexagonal baskets
79.775	Hexagonal baskets
65.746	Hexagonal baskets
61.682	Hexagonal baskets
65.307	Hexagonal baskets
64.656	Hexagonal baskets
68.108	Hexagonal baskets
69.642	Hexagonal baskets
66.56	Hexagonal baskets
60.776	Hexagonal baskets
73.065	Hexagonal baskets
69	Hexagonal baskets
58	Hexagonal baskets
65	Hexagonal baskets
69	Hexagonal baskets
66	Hexagonal baskets
66	Hexagonal baskets
67	Hexagonal baskets
73	Hexagonal baskets
68	Hexagonal baskets
63	Hexagonal baskets
75	Hexagonal baskets
72	Hexagonal baskets
67	Hexagonal baskets
75	Hexagonal baskets
66	Hexagonal baskets
67	Hexagonal baskets
64	Hexagonal baskets
67	Hexagonal baskets
62	Hexagonal baskets
69	Hexagonal baskets
65	Hexagonal baskets
68	Hexagonal baskets
59	Hexagonal baskets
62	Hexagonal baskets
79	Hexagonal baskets
69	Hexagonal baskets
74	Hexagonal baskets
69	Hexagonal baskets
71	Hexagonal baskets
54	Hexagonal baskets
62	Hexagonal baskets
67	Hexagonal baskets
66	Hexagonal baskets
67	Hexagonal baskets
67	Hexagonal baskets
64	Hexagonal baskets
63	Hexagonal baskets
70	Hexagonal baskets
66	Hexagonal baskets
69	Hexagonal baskets
67	Hexagonal baskets
66	Hexagonal baskets
70	Hexagonal baskets
62	Hexagonal baskets
63	Hexagonal baskets
67	Hexagonal baskets
60	Hexagonal baskets
76	Hexagonal baskets
66	Hexagonal baskets
68	Hexagonal baskets
75	Hexagonal baskets
68	Hexagonal baskets
62	Hexagonal baskets
74	Hexagonal baskets
80	Hexagonal baskets
63	Hexagonal baskets
72	Hexagonal baskets
69	Hexagonal baskets
74	Hexagonal baskets
73	Hexagonal baskets
70	Hexagonal baskets
64	Hexagonal baskets
64	Hexagonal baskets
65.899	Hexagonal baskets
62.552	Hexagonal baskets
71.422	Hexagonal baskets
75.654	Hexagonal baskets
65.122	Hexagonal baskets
75	Hexagonal baskets
76	Hexagonal baskets
72	Hexagonal baskets
65	Hexagonal baskets
75	Hexagonal baskets
70	Hexagonal baskets
76	Hexagonal baskets
71	Hexagonal baskets
62	Hexagonal baskets
64	Hexagonal baskets
61	Hexagonal baskets
64	Hexagonal baskets
69	Hexagonal baskets
72	Hexagonal baskets
53	Hexagonal baskets
61	Hexagonal baskets
62.898	Pentagonal baskets
71.674	Pentagonal baskets
59	Pentagonal baskets
60	Pentagonal baskets
64	Pentagonal baskets
63	Pentagonal baskets
61	Pentagonal baskets
63	Pentagonal baskets
58	Pentagonal baskets
57	Pentagonal baskets
60	Pentagonal baskets
60	Pentagonal baskets
72	Pentagonal baskets
48	Pentagonal baskets
86.398	Medium sized basket
91.656	Medium sized basket
103.31	Medium sized basket
84.865	Medium sized basket
88.091	Medium sized basket
86.052	Medium sized basket
88.993	Medium sized basket
84.275	Medium sized basket
75.49	Medium sized basket
76	Medium sized basket
76	Medium sized basket
80	Medium sized basket
82	Medium sized basket
79	Medium sized basket
72	Medium sized basket
76	Medium sized basket
83	Medium sized basket
97	Medium sized basket
89	Medium sized basket
110	Medium sized basket
112	Medium sized basket
97	Medium sized basket
79	Medium sized basket
90	Medium sized basket
84	Medium sized basket
90	Medium sized basket
97	Medium sized basket
88	Medium sized basket
95	Medium sized basket
100	Medium sized basket
113	Medium sized basket
82.057	Medium sized basket
93.24	Medium sized basket
85	Medium sized basket
87	Medium sized basket
80	Medium sized basket
101	Medium sized basket
91	Medium sized basket
86	Medium sized basket
77	Medium sized basket
79	Medium sized basket
90	Medium sized basket
94	Medium sized basket
87	Medium sized basket
74	Medium sized basket
85	Medium sized basket
81	Medium sized basket
92	Medium sized basket
62	Medium sized basket
84	Medium sized basket
69	Medium sized basket

## Sheet: Intracellular_basket type_diame
Values from EM vesicles and pits from all experiment
Diameter	Type
68.482	Hexagonal basket			EM= endomembrane and intracellular membrane system
66.672	Hexagonal basket			Medium sized = Irregular basket type
72.058	Hexagonal basket
62.093	Hexagonal basket
70.601	Hexagonal basket
68.554	Hexagonal basket
64.407	Hexagonal basket
64	Hexagonal basket
63	Hexagonal basket
67	Hexagonal basket
63	Hexagonal basket
68	Hexagonal basket
66	Hexagonal basket
63	Hexagonal basket
61	Hexagonal basket
65	Hexagonal basket
65	Hexagonal basket
68	Hexagonal basket
81	Hexagonal basket
62	Hexagonal basket
71	Hexagonal basket
59	Hexagonal basket
65	Hexagonal basket
61	Hexagonal basket
69	Hexagonal basket
65	Hexagonal basket
58	Hexagonal basket
61	Hexagonal basket
74.337	Hexagonal basket
56	Hexagonal basket
77	Hexagonal basket
63	Hexagonal basket
67	Hexagonal basket
65	Hexagonal basket
66	Hexagonal basket
61	Hexagonal basket
65	Hexagonal basket
60	Hexagonal basket
71	Hexagonal basket
60	Hexagonal basket
53	Hexagonal basket
53	Hexagonal basket
59	Hexagonal basket
53	Hexagonal basket
55	Hexagonal basket
54	Hexagonal basket
54	Hexagonal basket
51	Hexagonal basket
59	Hexagonal basket
52	Hexagonal basket
61	Hexagonal basket
53	Hexagonal basket
56	Hexagonal basket
62	Hexagonal basket
55	Hexagonal basket
61	Hexagonal basket
51	Hexagonal basket
46	Hexagonal basket
51	Hexagonal basket
51	Hexagonal basket
52	Hexagonal basket
50	Hexagonal basket
51	Hexagonal basket
58	Hexagonal basket
50	Hexagonal basket
59	Hexagonal basket
62	Hexagonal basket
66	Hexagonal basket
68.182	Pentagonal basket
58.388	Pentagonal basket
66.861	Pentagonal basket
62.89	Pentagonal basket
70.301	Pentagonal basket
62.534	Pentagonal basket
65	Pentagonal basket
63	Pentagonal basket
58	Pentagonal basket
41	Pentagonal basket
50	Pentagonal basket
50	Pentagonal basket
43	Pentagonal basket
54	Pentagonal basket
48	Pentagonal basket
41	Pentagonal basket
85.269	Medium sized
79	Medium sized
95	Medium sized
87	Medium sized
83	Medium sized
71	Medium sized
76	Medium sized
71	Medium sized
85	Medium sized
68	Medium sized
71	Medium sized
89	Medium sized
80	Medium sized
67	Medium sized
76	Medium sized
114	Huge
92	Huge
101	Huge
100	Huge
104	Huge
