# Supplementary material for: Evolutionarily unique mechanistic framework of clathrin-mediated endocytosis in plants
Source: eLife journal article supplement (doi:10.7554/elife.52067), 2020-01-23
Supplement: fig2-data1 [file data for fig 2B.xlsx]

## Sheet: Sheet1
Raw data									Normalised data (highest value to 1)						FINAL PLOT VALUES
Time (s)	Mock						Average Mock	Time (s)	Normalised_Mock						Normalised_Average Mock	Loess average_R calculation
-44	0.344681	0.388017	0.234184	0.304258	0.364667	0.467528	0.350556	-44	0.613754	0.720267	0.428133	0.582333	0.758797	0.832824	0.680689	0.661531
-43	0.345355	0.416529	0.296813	0.317806	0.416947	0.43252	0.370995	-43	0.614955	0.773192	0.542632	0.608262	0.867581	0.770463	0.720376	0.687679
-42	0.341553	0.425601	0.323095	0.324192	0.366464	0.46598	0.374481	-42	0.608185	0.790033	0.590681	0.620485	0.762538	0.830067	0.727145	0.712794
-41	0.344286	0.412774	0.346877	0.342086	0.340252	0.435539	0.370302	-41	0.613051	0.766222	0.634159	0.654733	0.707995	0.775842	0.719031	0.736907
-40	0.348351	0.376726	0.309843	0.340359	0.388821	0.436457	0.36676	-40	0.62029	0.699308	0.566453	0.651428	0.809058	0.777477	0.712152	0.76005
-39	0.412634	0.463701	0.329056	0.366544	0.375384	0.436798	0.397353	-39	0.734756	0.860757	0.601578	0.701545	0.781097	0.778083	0.771556	0.782252
-38	0.415978	0.472418	0.346465	0.351599	0.40393	0.452126	0.407086	-38	0.74071	0.876937	0.633405	0.67294	0.840496	0.805388	0.790456	0.803558
-37	0.421399	0.450085	0.354749	0.378506	0.384043	0.450488	0.406545	-37	0.750362	0.835481	0.64855	0.72444	0.799116	0.802471	0.789405	0.823943
-36	0.444968	0.446883	0.390368	0.409128	0.422214	0.476678	0.431706	-36	0.792331	0.829537	0.713669	0.783047	0.878541	0.849123	0.838262	0.843336
-35	0.479791	0.495936	0.429988	0.438689	0.408843	0.449782	0.450505	-35	0.854338	0.920593	0.786101	0.839626	0.850719	0.801214	0.874764	0.861667
-34	0.478702	0.463761	0.427265	0.444618	0.444588	0.460598	0.453255	-34	0.852398	0.860868	0.781123	0.850973	0.925098	0.82048	0.880105	0.878865
-33	0.498799	0.478465	0.421945	0.471251	0.448729	0.455386	0.462429	-33	0.888185	0.888163	0.771397	0.901947	0.933714	0.811195	0.897918	0.894858
-32	0.499568	0.495711	0.444067	0.479887	0.429343	0.487715	0.472715	-32	0.889554	0.920176	0.81184	0.918476	0.893376	0.868785	0.917891	0.91015
-31	0.521247	0.5076	0.460868	0.495733	0.42137	0.468851	0.479278	-31	0.928156	0.942245	0.842557	0.948805	0.876786	0.835181	0.930635	0.925014
-30	0.521033	0.506002	0.475566	0.500781	0.432103	0.479023	0.485751	-30	0.927775	0.939279	0.869427	0.958466	0.899119	0.853302	0.943204	0.93904
-29	0.495518	0.490004	0.479812	0.502203	0.425212	0.48693	0.479946	-29	0.882342	0.909582	0.877189	0.961187	0.88478	0.867385	0.931932	0.951817
-28	0.561594	0.513765	0.498605	0.505873	0.446347	0.520963	0.507858	-28	1	0.953689	0.911547	0.968212	0.928757	0.92801	0.986129	0.962934
-27	0.557388	0.520626	0.49715	0.49494	0.454382	0.499179	0.503944	-27	0.992511	0.966426	0.908887	0.947286	0.945476	0.889206	0.97853	0.971978
-26	0.514602	0.489899	0.520224	0.518344	0.433456	0.514102	0.498438	-26	0.916325	0.909388	0.95107	0.992081	0.901934	0.915789	0.967838	0.978545
-25	0.529681	0.497024	0.523669	0.509723	0.455495	0.52349	0.506514	-25	0.943174	0.922614	0.957369	0.975582	0.947793	0.932511	0.983519	0.982885
-24	0.531552	0.497048	0.52347	0.522482	0.464465	0.537723	0.51279	-24	0.946506	0.922657	0.957005	1	0.966458	0.957865	0.995706	0.985573
-23	0.535492	0.516381	0.511538	0.521385	0.429027	0.499703	0.502254	-23	0.953522	0.958545	0.93519	0.997902	0.892719	0.890139	0.975248	0.987183
-22	0.528327	0.50928	0.520141	0.508407	0.467833	0.511891	0.507646	-22	0.940763	0.945365	0.950919	0.973061	0.973465	0.91185	0.985718	0.98829
-21	0.521033	0.499806	0.527603	0.515195	0.464995	0.561376	0.515002	-21	0.927775	0.927778	0.964561	0.986054	0.967561	1	1	0.988595
-20	0.552681	0.507594	0.519091	0.507888	0.438419	0.511097	0.506128	-20	0.98413	0.942235	0.948998	0.972068	0.912262	0.910436	0.982771	0.987518
-19	0.54987	0.503622	0.546988	0.501507	0.466434	0.517664	0.514348	-19	0.979124	0.934861	1	0.959857	0.970555	0.922134	0.99873	0.985212
-18	0.500677	0.510139	0.523159	0.494523	0.440929	0.512534	0.496993	-18	0.891528	0.946959	0.956436	0.946488	0.917484	0.912996	0.965033	0.981831
-17	0.524053	0.48488	0.525517	0.492222	0.472343	0.516739	0.502625	-17	0.933152	0.90007	0.960748	0.942084	0.982849	0.920486	0.975969	0.977528
-16	0.519932	0.473061	0.529711	0.492557	0.43187	0.496251	0.490564	-16	0.925815	0.878131	0.968415	0.942726	0.898634	0.883989	0.952548	0.972456
-15	0.501348	0.538713	0.525817	0.498642	0.473248	0.487826	0.504266	-15	0.892723	1	0.961296	0.954373	0.984733	0.868983	0.979154	0.966654
-14	0.515701	0.502694	0.51866	0.47966	0.462281	0.489088	0.494681	-14	0.918282	0.933138	0.948211	0.918042	0.961914	0.87123	0.960542	0.959951
-13	0.491451	0.474215	0.503549	0.493833	0.480585	0.449838	0.482245	-13	0.875101	0.880273	0.920586	0.945169	1	0.801313	0.936396	0.952188
-12	0.49303	0.498993	0.495099	0.462282	0.471771	0.490518	0.485282	-12	0.877912	0.926269	0.905137	0.884782	0.98166	0.873777	0.942293	0.943207
-11	0.48852	0.49748	0.505148	0.472104	0.462024	0.506418	0.488616	-11	0.869881	0.92346	0.923508	0.903581	0.961378	0.902101	0.948765	0.93285
-10	0.47864	0.471077	0.505749	0.460434	0.463102	0.505674	0.480779	-10	0.852289	0.874448	0.924607	0.881245	0.963622	0.900776	0.93355	0.921211
-9	0.467234	0.463615	0.491228	0.449948	0.435347	0.501232	0.468101	-9	0.831978	0.860597	0.89806	0.861175	0.905869	0.892862	0.908931	0.908481
-8	0.490031	0.480496	0.454421	0.426159	0.457263	0.506909	0.469213	-8	0.872572	0.891932	0.830769	0.815643	0.951471	0.902976	0.91109	0.894648
-7	0.470996	0.452078	0.437482	0.421132	0.434672	0.474956	0.448553	-7	0.838677	0.839181	0.799802	0.806023	0.904465	0.846056	0.870974	0.879699
-6	0.449391	0.438659	0.442037	0.410911	0.459172	0.477893	0.446344	-6	0.800206	0.814271	0.808129	0.786459	0.955443	0.851289	0.866684	0.863618
-5	0.450102	0.459391	0.41513	0.397072	0.446516	0.494003	0.443702	-5	0.801472	0.852756	0.758938	0.759973	0.92911	0.879986	0.861555	0.846395
-4	0.431679	0.472578	0.387438	0.391488	0.39959	0.475873	0.426441	-4	0.768668	0.877236	0.708311	0.749286	0.831465	0.84769	0.828038	0.828016
-3	0.414974	0.430444	0.377763	0.38314	0.413117	0.470125	0.414927	-3	0.738922	0.799023	0.690624	0.733308	0.859612	0.837452	0.805682	0.808484
-2	0.376866	0.387527	0.360347	0.348095	0.407319	0.449677	0.388305	-2	0.671066	0.719356	0.658784	0.666234	0.847549	0.801026	0.753989	0.787805
-1	0.340097	0.393718	0.345884	0.330171	0.445744	0.438115	0.382288	-1	0.605591	0.730849	0.632342	0.631928	0.927504	0.78043	0.742305	0.765985
0	0.39823	0.410429	0.325531	0.334583	0.444645	0.492688	0.401017	0	0.709106	0.761869	0.595134	0.640372	0.925216	0.877642	0.778672	0.743031
	0.561594	0.538713	0.546988	0.522482	0.480585	0.561376	0.515002
