# Supplementary material for: Evolutionarily unique mechanistic framework of clathrin-mediated endocytosis in plants
Source: eLife journal article supplement (doi:10.7554/elife.52067), 2020-01-23
Supplement: fig5-data1 [file HC CLCxTPLATE endosomePickup.xlsx]

## Sheet: Sheet1
HC endosome pickup CLC with Tplate tracks
	Exp	Con	n
001	29.4194	25.7624	277
002	37.1527	34.7073	265
003	38.5332	35.0806	56
004	27.2688	27.7028	397
005	32.9475	30.5932	108
332	29.7914	28.8173	436
