# Supplementary material for: Evolutionarily unique mechanistic framework of clathrin-mediated endocytosis in plants
Source: eLife journal article supplement (doi:10.7554/elife.52067), 2020-01-23
Supplement: fig5-data1 [file Root CLC TPLATE tracks endosomePickup.xlsx]

## Sheet: Sheet1
cell	Exp	Cont	n
526	43.8377	39.3428	38
527	42.9594	37.1084	26
528	30.496	24.3801	84
529	39.3562	28.544	109
537	36.9318	29.2242	44
539	31.3948	30.455	321
			622
